# Supplementary material for: Predicting Deep-Seated Landslide Displacements in Mountains through the Integration of Convolutional Neural Networks and Age of Exploration-Inspired Optimizer
Source: Copernicus journal article supplement (doi:10.5194/nhess-2024-86), 2024-06-10
Supplement: Supplementary file [file nhess-2024-86-AC1-supplement.pdf]

## Summary of the Changes to Reviewer 1's Recommendations and Comments

**Journal: Natural Hazards and Earth System Sciences**

**Ref: NHESS-2024-86**

Title: Predicting Deep-Seated Landslide Displacements in Lushan Mountains through the Integration of Convolutional Neural Networks and an Age of Exploration-Inspired Optimizer

The authors appreciate the reviewer's valuable feedback. The summary of the changes based on the reviewer's recommendations & comments is listed below. All the revisions are TRACKED in the re-submitted WORD file along with marked RED COLOR for the ease of the reviewer's perusal. Our colleague, a native English speaker of BLUE COLOR, has corrected grammatical and writing style errors in the original version.

| <b>Recommendations and Comments of Reviewer</b>                                                                                                                                                                                                                                                                                                                                                                                                                                                                                                                                                                                                                                                                                                                                                                                                                                                                                                                                                                                                                                                                                                                                                                                                                                                                                                                                                                                                                                                                                                                                | <b>Authors' Summary of the Changes</b>                                                                                                                                                                                                                                                                                                                                                                                                                                                                                |
|--------------------------------------------------------------------------------------------------------------------------------------------------------------------------------------------------------------------------------------------------------------------------------------------------------------------------------------------------------------------------------------------------------------------------------------------------------------------------------------------------------------------------------------------------------------------------------------------------------------------------------------------------------------------------------------------------------------------------------------------------------------------------------------------------------------------------------------------------------------------------------------------------------------------------------------------------------------------------------------------------------------------------------------------------------------------------------------------------------------------------------------------------------------------------------------------------------------------------------------------------------------------------------------------------------------------------------------------------------------------------------------------------------------------------------------------------------------------------------------------------------------------------------------------------------------------------------|-----------------------------------------------------------------------------------------------------------------------------------------------------------------------------------------------------------------------------------------------------------------------------------------------------------------------------------------------------------------------------------------------------------------------------------------------------------------------------------------------------------------------|
| <p>This paper by Chou et al. describes an effort to test the sensitivity of various machine learning models on forecasting deep-seated landslide displacement over single-day and weeklong timescales. The authors utilize two sets of extensometer data that record landslide displacement at Lushan Mountain in Taiwan over a period from 2009-2017, along with four records of groundwater well data and satellite-derived temperature and humidity data. Over this time, the extensometer data record multiple pulses of movement that appear to correspond to peaks in groundwater levels, suggesting a connection to pore-water pressure increases via rising water tables. The authors employ their record of time series data to train a bevy of various AI models, and then from the two top-performing models fine-tune their hyperparameters using a newly released optimization algorithm (the Age of Exploration-Inspired Optimizer, or AEIO). The authors find that: 1) many models perform well in forecasting landslide displacement although there are tradeoffs between accuracy and computation time (impressively low errors from ~4-7% in the best cases); and 2) the AEIO algorithm successfully reduces uncertainty in their top models.</p> <p>Overall, the authors present a clear description of the AI models used in the analysis and show convincingly that for the study monitoring sites machine learning algorithms can indeed be used to accurately forecast landslide displacement, even at the multi-day time scale. Showing that these</p> | <p>As authors, we wish to express our sincere gratitude to the reviewers for their time and effort in thoroughly evaluating our research. We are encouraged by the recognition that our study may contribute to NHESS. In response to the reviewers' insightful suggestions, we will revise our manuscript accordingly. The following sections will address each revision in detail. We hope that these updates will meet the reviewers' expectations and align with the high standards of NHESS for publication.</p> |

methods yield a ~5% error on a seven-day forecast of landslide displacement is highly impressive and has obvious societal relevance. The AEIO method (complete with a very fanciful Fig. 8) does appear to work well in reducing the prediction uncertainty for the top-performing models. Therefore, I think the paper succeeds in showing the practical utility of applying optimized AI-based methods to this type of extensometer data and the benefits of running an optimization scheme on improving model performance. As presented, however, the manuscript feels somewhat lopsided as there is comparatively little information about the landslide itself and any in-depth analysis on connections from the model(s) to the results. For example, how much does the choice of input parameters impact performance? Are four groundwater datasets necessary, or would one suffice? Does including humidity data actually help improve model results, or is it extraneous? These are the types of questions worth discussing that may help yield more insight and understanding that may expand the utility of these results beyond the authors' study data (and thus would be of increased relevance to the global NHESS readership). Beyond these primary concerns, there are a number of smaller line-by-line technical and editorial comments I provide below that warrant addressing by the authors. If the authors can address these comments, I think this manuscript will make a useful contribution to NHESS.

1: I'm not sure the phrase "in Mountains" is necessary here.  
 2: I believe the word "an" should perceive "Age of Exploration-Inspired Optimizer".

We have identified inaccuracies in the title based on the reviewer's comments. We will replace the phrase "in Mountains" with "in Lushan Mountain" to provide readers with more precise information about the data collection and research location. Additionally, as suggested by the reviewer, we will add the word "an" before "Age of Exploration-Inspired Optimizer."

1 Predicting Deep-Seated Landslide Displacements in **Lushan Mountains** through the  
 2 Integration of Convolutional Neural Networks and **an** Age of Exploration-Inspired Optimizer

3 Jui-Sheng Chou<sup>1</sup>, Hoang-Minh Nguyen<sup>1</sup>, Huy-Phuong Phan<sup>1</sup>, Kuo-Lung Wang<sup>2</sup>  
 4 <sup>1</sup>Department of Civil and Construction Engineering, National Taiwan University of Science and Technology, Taipei, Taiwan  
 5 <sup>2</sup>Department of Civil Engineering, National Chi Nan University, Nantou, Taiwan  
 6 (jschou@mail.ntust.edu.tw; hoangminhka1992@gmail.com; huyphuong777@gmail.com; kwang@ncnu.edu.tw)  
 7 \*Correspondence e-mail address: jschou@mail.ntust.edu.tw

9: Nothing is done in this manuscript to show that deep-seated landslides are becoming increasingly frequent due to changing climate patterns. Is there a reference the author can provide that shows this in

We greatly appreciate the reviewer's comment. The reviewer correctly pointed out that our study does not demonstrate the argument that deep-seated landslides are becoming more frequent due to

|                                                                                                                                                                                                                                                                                                                                       |                                                                                                                                                                                                                                                                                                                                                                                                                                                                                                                                                                                                                                                                                                                                                                                                                                                                                                                                                                                                                                                                                                                                                                                                                                                                                                                                                                                                                                                                                                       |
|---------------------------------------------------------------------------------------------------------------------------------------------------------------------------------------------------------------------------------------------------------------------------------------------------------------------------------------|-------------------------------------------------------------------------------------------------------------------------------------------------------------------------------------------------------------------------------------------------------------------------------------------------------------------------------------------------------------------------------------------------------------------------------------------------------------------------------------------------------------------------------------------------------------------------------------------------------------------------------------------------------------------------------------------------------------------------------------------------------------------------------------------------------------------------------------------------------------------------------------------------------------------------------------------------------------------------------------------------------------------------------------------------------------------------------------------------------------------------------------------------------------------------------------------------------------------------------------------------------------------------------------------------------------------------------------------------------------------------------------------------------------------------------------------------------------------------------------------------------|
| <p>order to justify its presence in the abstract? This is certainly a nuanced topic as projected climatic changes may impact different areas (and thus landslide-triggering potential) differently across the globe, and therefore it is difficult to make these blanket statements.</p> <p>11: insert “by” after “displacements”</p> | <p>changing climate patterns. As such, it is inappropriate to include this argument in the abstract, and we have revised the sentence accordingly. Additionally, we have added the word "by" after "displacement," as suggested by the reviewer.</p> <p>8 Abstract</p> <p>9 <del>Deep-seated landslides, becoming increasingly frequent due to changing climate patterns, pose significant risks to human life and infrastructure. This research contributes to</del> Landslides have caused substantial damage to both human life and infrastructure in the past. Developing an early warning system for this type of disaster is crucial to reduce its impact on society. This research contributes to developing predictive early warning systems for deep-seated slope displacements by employing advanced computational models for environmental risk management. Our novel framework integrates machine learning, time series deep</p>                                                                                                                                                                                                                                                                                                                                                                                                                                                                                                                                                          |
| <p>25: There are certainly more than 378 landslides recorded worldwide between 1997 and 2017. Is this a specific subset of slides from this study? If so, a little more context needs to be provided here on what this number represents.</p>                                                                                         | <p>In this section, we aim to provide data to demonstrate that landslides have significant negative impacts on our lives. However, as suggested by the reviewer, it appears that the data used may not be accurate. Therefore, we have sought new data and revised this section accordingly.</p> <p>26 1. Introduction</p> <p>27 <del>The 378 landslides recorded worldwide between 1997 and 2017 resulted in the deaths of 18,414 people and left 4.8 million others injured, with associated costs estimated at around USD 8 billion (Agesenko et al., 2022)</del> Landslides are among the most devastating natural disasters (Huang and Fan, 2013), claiming an average of over 4,000 lives annually worldwide between 2004 and 2010 (Petley, 2012). Landslides represent a global hazard, particularly in developing countries, where rapid urbanization, population growth, and significant land use changes occur (Caleca et al., 2024). The identification,</p>                                                                                                                                                                                                                                                                                                                                                                                                                                                                                                                               |
| <p>35: The 10 m threshold for defining a deep-seated landslide seems arbitrary. Dou et al. (2015) use 10 m as an example in their example sketch (their Fig. 5), but they do not reference this as a specific genetic guideline. Please use a more appropriate definition here.</p>                                                   | <p>We fully agree with the reviewer that using the definition of “deep-seated landslide” from Dou et al. (2015) was inappropriate. Consequently, we have revised this paragraph to adopt the definition provided by Lin et al. (2013) and included the relevant references. We hope this revised definition offers greater clarity and accuracy, addressing the reviewer's concerns.</p> <p>36 al., 2014). These issues are further exacerbated in countries with complex geological and climatic conditions.</p> <p>37 <del>Deep-seated landslides, or gravitational deformations, involve slow movement of soil or rock at depths greater than 10m, impacting large areas and leading to significant debris flows (Dou et al., 2015).</del> A deep-seated landslide involves the gradual and persistent displacement of a substantial amount of soil and rock, which can escalate into a sudden and devastating event (Kilburn and Petley, 2003; Geertsema et al., 2006; Chigira, 2009). Unlike shallow landslides, which typically affect surface layers to a depth of a few meters, deep-seated landslides extend deeper, often exceeding 10 meters, and can involve the movement of underlying bedrock (Lin et al., 2013). Predicting these events is challenging and costly (Thai Pham et al., 2019). Therefore, extensive efforts have been made to predict such disasters throughout history. One method that has been employed involves thoroughly examining the physical and geological</p> |
| <p>41-42: This sentence feels out of place here since the paragraph is just discussing background. It would fit better in the final paragraph of this section outlining the goals of the specific study (i.e., lines 63-76)</p>                                                                                                       | <p>We agree that the inclusion of this sentence in this paragraph is not appropriate as it only discusses the background of the study. Therefore, we will remove this sentence.</p> <p>48 level of groundwater has been shown by numerous studies in the past to influence the mechanisms behind landslide formation significantly (Miao and Wang, 2023; Preisig, 2020). <del>Consequently, in this study, groundwater levels will serve as inputs for models designed to predict landslides.</del></p> <p>50 In pursuing a generalized approach to landslide forecasting, researchers have determined that the critical factors associated with slope instability exhibit temporal variability, necessitating using time series</p>                                                                                                                                                                                                                                                                                                                                                                                                                                                                                                                                                                                                                                                                                                                                                                  |
| <p>54: editorial suggestion – can remove “In</p>                                                                                                                                                                                                                                                                                      | <p>The phrase “In contemporary times” has been</p>                                                                                                                                                                                                                                                                                                                                                                                                                                                                                                                                                                                                                                                                                                                                                                                                                                                                                                                                                                                                                                                                                                                                                                                                                                                                                                                                                                                                                                                    |

|                                                                                                                                                           |                                                                                                                                                                                                                                                                                                                                                                                                                                                                                                                                                                                                                                                                                                                                                                                                                                                                                                                                                                                                                                                                                                                                                                                                                                                                                                                                                                                                                                                                                                                                                                                                                                                                                                                                     |
|-----------------------------------------------------------------------------------------------------------------------------------------------------------|-------------------------------------------------------------------------------------------------------------------------------------------------------------------------------------------------------------------------------------------------------------------------------------------------------------------------------------------------------------------------------------------------------------------------------------------------------------------------------------------------------------------------------------------------------------------------------------------------------------------------------------------------------------------------------------------------------------------------------------------------------------------------------------------------------------------------------------------------------------------------------------------------------------------------------------------------------------------------------------------------------------------------------------------------------------------------------------------------------------------------------------------------------------------------------------------------------------------------------------------------------------------------------------------------------------------------------------------------------------------------------------------------------------------------------------------------------------------------------------------------------------------------------------------------------------------------------------------------------------------------------------------------------------------------------------------------------------------------------------|
| contemporary times”                                                                                                                                       | <p>removed according to the reviewer's suggestion.</p> <p>58 One of the most effective solutions for constructing models to predict time series data involves<br/> 59 applying data-driven techniques. The advancement of computational capabilities has driven the<br/> 60 widespread adoption of data-driven machine-learning models over physics-based models. This shift is<br/> 61 based on the premise that the data used for slope monitoring originates from nonlinear systems (Zhou et<br/> 62 al., 2018). <del>In contemporary times</del>, An increasing array of novel data-driven solutions is being developed<br/> 63 to overcome the constraints of traditional machine-learning approaches. <del>Among these data-driven</del><br/> 64 <del>solutions, convolutional neural networks (CNNs) have emerged as one of the most effective methods.</del><br/> 65 These CNN models, which excel at automated feature extraction, can enhance efficiency in analyzing<br/> 66 complex datasets and improve the accuracy of prediction results (Alzubaidi et al., 2021).</p>                                                                                                                                                                                                                                                                                                                                                                                                                                                                                                                                                                                                                                               |
| 55: CNN has not been defined before the introduction of this acronym                                                                                      | <p>We have added an additional sentence beforehand to clearly explain the abbreviation 'CNN' and to further elaborate on the paragraph's content.</p> <p>58 One of the most effective solutions for constructing models to predict time series data involves<br/> 59 applying data-driven techniques. The advancement of computational capabilities has driven the<br/> 60 widespread adoption of data-driven machine-learning models over physics-based models. This shift is<br/> 61 based on the premise that the data used for slope monitoring originates from nonlinear systems (Zhou et<br/> 62 al., 2018). <del>In contemporary times</del>, An increasing array of novel data-driven solutions is being developed<br/> 63 to overcome the constraints of traditional machine-learning approaches. <del>Among these data-driven</del><br/> 64 <del>solutions, convolutional neural networks (CNNs) have emerged as one of the most effective methods.</del><br/> 65 These CNN models, which excel at automated feature extraction, can enhance efficiency in analyzing<br/> 66 complex datasets and improve the accuracy of prediction results (Alzubaidi et al., 2021).</p>                                                                                                                                                                                                                                                                                                                                                                                                                                                                                                                                                |
| 64: The term “predict deep-seated landslides” sounds vague. Predicting incipient failure? Reactivation of an already-established failure? Please specify. | <p>We fully agree that the term “predict deep-seated landslides” is unclear. We will revise this term to “predict deep-seated displacement”.</p> <p>72 Leveraging the effective methodologies mentioned above, this study employs AI models optimized<br/> 73 by an innovative metaheuristic optimization algorithm to predict deep-seated <del>landslides displacement</del> on<br/> 74 the northern slope of Lushan Mountain in <del>Ren'ai Ren'ai</del> Township, Nantou County. The geological</p>                                                                                                                                                                                                                                                                                                                                                                                                                                                                                                                                                                                                                                                                                                                                                                                                                                                                                                                                                                                                                                                                                                                                                                                                                              |
| 65-66: Please list references of pre-existing work that you are referencing here                                                                          | <p>Thank you to the reviewer for this comment. It was an oversight on our part not to include the relevant references to support this point. We have now added the appropriate references, as shown below.</p> <p>74 the northern slope of Lushan Mountain in <del>Ren'ai Ren'ai</del> Township, Nantou County. The geological<br/> 75 characteristics of this area have undergone extensive research (Wang et al., 2015; Lin et al., 2020).<br/> 76 Previous studies have identified varying depths of the shear plane. Specifically, Wang et al. determined<br/> 77 the depth of the shear plane is 85m and 106m based on inclinometer data (Lin et al., 2020). This research<br/> 78 paper is firmly grounded in empirical evidence meticulously collected over eight years from</p>                                                                                                                                                                                                                                                                                                                                                                                                                                                                                                                                                                                                                                                                                                                                                                                                                                                                                                                                             |
| 67: Impressive! At what depth is the failure plane for each of these extensometers?                                                                       | <p>The geology and shear planes of the Lushan Mountain region have been studied previously, revealing shear planes at depths of 85m and 108m. We have incorporated this information into the manuscript as suggested by the reviewer.</p> <p>74 the northern slope of Lushan Mountain in <del>Ren'ai Ren'ai</del> Township, Nantou County. The geological<br/> 75 characteristics of this area have undergone extensive research (Wang et al., 2015; Lin et al., 2020).<br/> 76 Previous studies have identified varying depths of the shear plane. Specifically, Wang et al. determined<br/> 77 the depth of the shear plane is 85m and 106m based on inclinometer data (Lin et al., 2020). This research<br/> 78 paper is firmly grounded in empirical evidence meticulously collected over eight years from<br/> 502 research area and shows the distribution of four survey boreholes (G20, G21, G18, and G25) along the<br/> 503 slope. Regolith, slate, and meta-sandstone are three distinct lithological units revealed through drilling.<br/> 504 Additionally, the study by Lin et al. identified the depths of failure planes in these survey boreholes.<br/> 505 Specifically, boreholes G18 and G25 did not record any failure planes, while boreholes G20 and G21<br/> 506 recorded failure planes at depths of 85 meters and 106 meters, respectively. These failure planes were<br/> 507 identified based on inclinometer data from the corresponding study (Lin et al., 2020).<br/> 508 Initially, the thickness of the topmost regolith layer was found to be less than 10 meters. Secondly,<br/> 509 slate predominated, exhibiting a notable presence with sporadic evidence of weathering that resulted in</p> |
| 88-92: This section feels quite under-referenced, as there are numerous theoretical and observational examples of groundwater impacts on deep-seated      | <p>We fully agree with the reviewer's comment. Accordingly, we have included examples from both theoretical and observational studies to clarify this</p>                                                                                                                                                                                                                                                                                                                                                                                                                                                                                                                                                                                                                                                                                                                                                                                                                                                                                                                                                                                                                                                                                                                                                                                                                                                                                                                                                                                                                                                                                                                                                                           |

landslide failure.

point.

101 Casimiro, 2023; Jones et al., 2023). Among these, hydrological conditions, especially groundwater levels,  
102 have been one of the most critical elements considered in studies related to landslide prediction. Numerous  
103 studies have substantiated this point. For instance, research by Take et al. demonstrated that the distance  
104 and velocity of landslides triggered under high antecedent groundwater conditions are significantly more  
105 significant compared to scenarios with drier conditions (Take et al., 2015). Another study has shown that  
106 the accumulation of water at a soil-bedrock contact can develop of positive pore water pressures, causing  
107 landslides (Matsushi and Matsukura, 2007) (see Figure 1). Moreover, studies on past landslide events have  
108 also demonstrated similar findings. ~~example~~ Examples of this research include the Tessa landslide in  
109 northeastern Italy, where groundwater conditions triggered movement (Petley et al., 2005). Additionally,  
110 the study by Keqiang et al. on water-induced landslides in the Three Gorges Reservoir project area  
111 highlights the significant impact of hydrological conditions on the likelihood of such disasters (Keqiang  
112 et al., 2015).

93-94: This is another purely editorial comment, but the citation style presented here could be more succinct. For example, “Similarly, Preisig (2020) developed...” rather than “Similarly, Presig developed a groundwater prediction... (Presig, 2020).” This same style is utilized throughout the manuscript

We fully agree with the reviewer's suggestion and have revised the citation at this location to make it more concise.

113 Similarly, Preisig (2020) developed a groundwater prediction model for analyzing the stability of a  
114 compound slide in the Jura Mountains (Preisig, 2020). Additionally, Srivastava et al. explored machine

In addition, we have used the citation style suggested by the reviewer for similar cases throughout the manuscript.

76 Previous studies have identified varying depths of the shear plane. Specifically, Lin et al. (2020)  
77 determined the depth of the shear plane is 85m and 106m based on inclinometer data. This research paper  
102 have been one of the most critical elements considered in studies related to landslide prediction. Numerous  
103 studies have substantiated this point. For instance, research by Take et al. (2015) demonstrated that the  
104 distance and velocity of landslides triggered under high antecedent groundwater conditions are  
105 significantly more significant compared to scenarios with drier conditions. Another study has shown that  
109 northeastern Italy, where groundwater conditions triggered movement (Petley et al., 2005). Additionally,  
110 the study by Keqiang et al. (2015) on water-induced landslides in the Three Gorges Reservoir project area  
111 highlights the significant impact of hydrological conditions on the likelihood of such disasters (Keqiang  
112 et al., 2015).

113 Similarly, Preisig (2020) developed a groundwater prediction model for analyzing the stability of a  
114 compound slide in the Jura Mountains (Preisig, 2020). Additionally, Srivastava et al. (2020) explored  
115 machine learning algorithms to forecast rainfall and established thresholds for landslide probabilities  
116 (Srivastava et al., 2020). Although the research by Srivastava et al. did not directly rely on groundwater  
122 heavy rainfall events. Lin et al. (2020) conducted in-depth studies on the mechanisms of landslide  
123 occurrence based on the geological conditions of the area (Lin et al., 2020). While successfully providing

141 For instance, Crosta and Agliardi (2003) analyzed the geology and rock mass behavior using  
142 Voight's semi-empirical failure criterion, incorporating time-dependent factors to generate velocity curves  
143 that indicate risk levels (Crosta and Agliardi, 2003). Recently, Xu et al. (2018) utilized real-time remote  
144 monitoring systems to measure internal stress, deep displacement, and surface strain. This data was used  
145 to formulate forecasting models to assess slope stability, particularly in railway construction (Xu et al.,  
146 2018). However, a common challenge with this method is the instability and frequent changes in the terrain  
155 reservoir in Italy (Mufundirwa et al., 2010). In another study, Wu (2010) employed the numerical  
156 discontinuous deformation analysis method to simulate a blocky assembly's post-failure behavior,  
157 incorporating earthquake seismic data (Wu, 2010). Meanwhile Another study follow this trend by Jiang  
158 et al. (2011), who utilized fluid-solid coupling theory to simulate displacement and capture capturing the  
159 interaction between fluid and solid materials (Jiang et al., 2011). However, both numerical models and  
165 acting on a slope behavior. Fu and Liao (2010) presented a technique for implementing the non-linear  
166 Hoek-Brown shear strength reduction, determining the correlation between normal and shear stress based  
167 on the Hoek-Brown criterion (Fu and Liao, 2010). Subsequently, the micro-units (microscopic  
184 maps depicting landslide susceptibility. For instance, Margarint et al. (2013) employed a logistic  
185 regression model to predict landslides based on discrete data in four regions of Romania (Margarint et  
186 al., 2013). The logistic regression model yielded promising predictions, with an AUC value (area under  
188 utilized to construct a map of landslide susceptibility in the study area. In a similar study, Pham et al.  
189 (2016) utilized multiple AI models, including support vector machines (SVM), logistic regression (LR),  
190 Fisher's Fisher's linear discriminant analysis (FLDA), Bayesian network (BN), and naive Bayes (NB), for  
191 landslide susceptibility assessment in a region within the Uttarakhand state of India (Pham et al., 2016).

230 temporal data. For instance, Dahal et al. (2024) utilized spatial-temporal data to pinpoint where landslides  
231 may occur and predict when they might happen and the expected landslide area density per mapping unit  
232 (Dahal et al., 2024). The Ensemble Neural Network employed in this research yielded promising  
238 optimization algorithms optimize the hyperparameters of AI models. For example, Balogun et al. (2021)  
239 studied landslide susceptibility mapping in Western Serbia (Balogun et al., 2021). This research collected  
244 Hakim et al. (2022) conducted a study utilizing CNN models optimized by the GWO and imperialist  
245 competitive algorithm (ICA) for landslide susceptibility mapping from geo-environmental and topo-  
246 hydrological factors in Incheon, Korea (Hakim et al., 2022). This research demonstrates that GWO and

|                                                                                                                                                                                                                                                                                                       |                                                                                                                                                                                                                                                                                                                                                                                                                                                                                                                                                                                                                                                                                                                                                                                                                                                                                                                                                                                                                                                                                                                                                                                                                                                                                                                                                                                                                                                                                                                                                                                                                         |
|-------------------------------------------------------------------------------------------------------------------------------------------------------------------------------------------------------------------------------------------------------------------------------------------------------|-------------------------------------------------------------------------------------------------------------------------------------------------------------------------------------------------------------------------------------------------------------------------------------------------------------------------------------------------------------------------------------------------------------------------------------------------------------------------------------------------------------------------------------------------------------------------------------------------------------------------------------------------------------------------------------------------------------------------------------------------------------------------------------------------------------------------------------------------------------------------------------------------------------------------------------------------------------------------------------------------------------------------------------------------------------------------------------------------------------------------------------------------------------------------------------------------------------------------------------------------------------------------------------------------------------------------------------------------------------------------------------------------------------------------------------------------------------------------------------------------------------------------------------------------------------------------------------------------------------------------|
|                                                                                                                                                                                                                                                                                                       | <p>248 Jaafari et al. (2022) employed an AI model known as the group method of data handling (GMDH)<br/> 249 for classification purposes, optimizing it using the cuckoo search algorithm (CSA) and the whale<br/> 250 optimization algorithm (WOA). In northwest Iran, they aimed to predict landslides based on various<br/> 251 factors, including topographical, geomorphological, and other environmental factors (Jaafari et al., 2022).<br/> 499 In an early study of deep landslides in this area, Lin et al. (Lin et al. (2020) reported that the Lushan<br/> 500 slope exhibits large-scale deep-seated gravitational slope deformation, characterized by a steep scarp, a<br/> 520 also exhibit inter-cleavage gouges. Further details on this geological information can be found in the study<br/> 521 by Lin et al. (2020). These instances highlight the potential for significant geological changes and<br/> 522 landslide risk in this region.<br/> 530 level gauges (A-17, A-18-2, A-20, and A-24). The transmission, storage, and processing of data are<br/> 531 described in detail in the research of Lau et al. in 2023 (Lau et al., (2023).<br/> 664 Similar to the machine learning models, in this section, the time series deep learning models will<br/> 665 also be trained with default hyperparameters, as found in research of Chou and Nguyen's research in 2023<br/> 666 Chou and Nguyen (2023). The performance results of these models are shown in Table 7. Overall, akin to</p>                                                                                                  |
| <p>103-105: In what way did Lin et al. “somewhat overlook” the importance of hydrological conditions in landslide formation here? Please be specific.</p>                                                                                                                                             | <p>In fact, the research by Lin et al. has accounted for hydrological conditions in landslide formation. Therefore, we have revised the motivation section accordingly. Our research will incorporate the use of AI models to predict deep-seated displacement at Lushan Mountain, a task that has not yet been addressed by previous studies about landslides in this area.</p> <p>122 heavy rainfall events. Lin et al. (2020) conducted in-depth studies on the mechanisms of landslide<br/> 123 occurrence based on the geological conditions of the area (Lin et al., 2020). While successfully providing<br/> 124 valuable insights into the evolution of deep-seated gravitational deformations, their research somewhat<br/> 125 overlooked the importance of hydrological conditions and groundwater levels in landslide formation; their<br/> 126 study focuses exclusively on employing traditional analytical methods in geological research, such as<br/> 127 analyzing data from geotechnical instruments and conducting geological borehole analysis.<br/> 128 Our research aims to adopt a novel approach compared to previous landslide studies at Lushan<br/> 129 Mountain by utilizing AI models and metaheuristic optimization algorithms. This research will utilize to<br/> 130 address the limitations of previous landslide research in the Lushan Mountain area, this study will explore<br/> 131 using hydrological weather conditions and groundwater levels as inputs for AI models to predict deep-<br/> 132 seated displacement, thus aiding in landslide forecasting in this region.</p> |
| <p>110 (Figure 1). Where is the actual landslide here? Below the diagram? I find the arrow below the right diagram very confusing and vague. A schematic failure plane perhaps informed by the borehole data would be useful for clarifying what it is the authors are trying to illustrate here.</p> | <p>We have revised Figure 1 by removing the arrow and the text 'deep-seated slope failure,' and adding a label for the 'failure plane.' We hope these modifications meet the reviewer's expectations.</p> 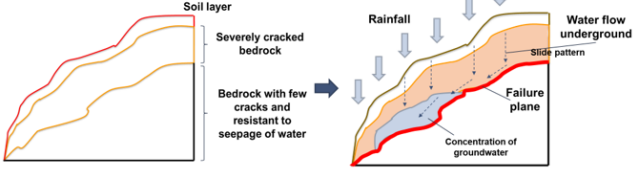 <p>133<br/> 134 Figure 1. Schematic illustration showing the effects of groundwater on deep-seated slope failure</p>                                                                                                                                                                                                                                                                                                                                                                                                                                                                                                                                                                                                                                                                                                                                                                                                                                                                                                                                                                                                                                                                                                                                                                                                     |
| <p>122: Numerical models can simulate many scales, not just the laboratory scale. Please fix.</p>                                                                                                                                                                                                     | <p>We have revised this section according to the reviewer's suggestion.</p> <p>149 Moreover, physical-based numerical and laboratory modeling methods, which simulate phenomena<br/> 150 at a laboratory scale, are also gaining traction in landslide research. These methods aim to maintain<br/> 151 forecasts using various data types while reducing human workload and ensuring high accuracy. For<br/> 152 example, Mufundirwa et al. conducted a laboratory study to examine the effectiveness of the inverse</p>                                                                                                                                                                                                                                                                                                                                                                                                                                                                                                                                                                                                                                                                                                                                                                                                                                                                                                                                                                                                                                                                                               |
| <p>125: Does this Mufundirwa et al. reference also utilize a numerical model? If not, this paragraph should perhaps speak to both laboratory and numerical studies.</p>                                                                                                                               | <p>We have revised this paragraph to include references to both laboratory and numerical studies, as suggested by the reviewer.</p> <p>149 Moreover, physical-based numerical and laboratory modeling methods, which simulate phenomena<br/> 150 at a laboratory scale, are also gaining traction in landslide research. These methods aim to maintain<br/> 151 forecasts using various data types while reducing human workload and ensuring high accuracy. For<br/> 152 example, Mufundirwa et al. conducted a laboratory study to examine the effectiveness of the inverse</p>                                                                                                                                                                                                                                                                                                                                                                                                                                                                                                                                                                                                                                                                                                                                                                                                                                                                                                                                                                                                                                       |

|                                                                                                                                                                                                                                                                         |                                                                                                                                                                                                                                                                                                                                                                                                                                                                                                                                                                                                                                                                                                                                                                                                                                                                                                                                                                                                                                                                                                                                                                                                                                                                                                                                                                                                                                                                                                                                                                                                                                                                                                                                                                                                                                                                                                                                                                                                                                                                                                                                                                                                                                                                                                                                                                                                                                                                                                                                                                                                                                                                                                                                                                                                                                                                                                                                                                                                                                                                                                                                                                                                                                                                                                                                                                                                                                                                                                                                                                                                                                                                                                                                                                                                                                                                                                                                                                                                             |
|-------------------------------------------------------------------------------------------------------------------------------------------------------------------------------------------------------------------------------------------------------------------------|-------------------------------------------------------------------------------------------------------------------------------------------------------------------------------------------------------------------------------------------------------------------------------------------------------------------------------------------------------------------------------------------------------------------------------------------------------------------------------------------------------------------------------------------------------------------------------------------------------------------------------------------------------------------------------------------------------------------------------------------------------------------------------------------------------------------------------------------------------------------------------------------------------------------------------------------------------------------------------------------------------------------------------------------------------------------------------------------------------------------------------------------------------------------------------------------------------------------------------------------------------------------------------------------------------------------------------------------------------------------------------------------------------------------------------------------------------------------------------------------------------------------------------------------------------------------------------------------------------------------------------------------------------------------------------------------------------------------------------------------------------------------------------------------------------------------------------------------------------------------------------------------------------------------------------------------------------------------------------------------------------------------------------------------------------------------------------------------------------------------------------------------------------------------------------------------------------------------------------------------------------------------------------------------------------------------------------------------------------------------------------------------------------------------------------------------------------------------------------------------------------------------------------------------------------------------------------------------------------------------------------------------------------------------------------------------------------------------------------------------------------------------------------------------------------------------------------------------------------------------------------------------------------------------------------------------------------------------------------------------------------------------------------------------------------------------------------------------------------------------------------------------------------------------------------------------------------------------------------------------------------------------------------------------------------------------------------------------------------------------------------------------------------------------------------------------------------------------------------------------------------------------------------------------------------------------------------------------------------------------------------------------------------------------------------------------------------------------------------------------------------------------------------------------------------------------------------------------------------------------------------------------------------------------------------------------------------------------------------------------------------------|
| <p>130: editorial – can delete “Meanwhile,” here</p>                                                                                                                                                                                                                    | <p>We have removed the term 'Meanwhile' and revised the sentence accordingly, as suggested by the reviewer.</p> <p>155 reservoir in Italy (Mufundirwa et al., 2010). In another study, Wu (2010) employed the numerical<br/> 156 discontinuous deformation analysis method to simulate a blocky assembly's post-failure behavior,<br/> 157 incorporating earthquake seismic data (Wu, 2010). Meanwhile Another study follow this trend by Jiang<br/> 158 et al. (2011), who utilized fluid-solid coupling theory to simulate displacement and capture capturing the<br/> 159 interaction between fluid and solid materials (Jiang et al., 2011). However, both numerical models and<br/> 160 laboratory modeling methods require substantial effort from researchers. These approaches demand deep</p>                                                                                                                                                                                                                                                                                                                                                                                                                                                                                                                                                                                                                                                                                                                                                                                                                                                                                                                                                                                                                                                                                                                                                                                                                                                                                                                                                                                                                                                                                                                                                                                                                                                                                                                                                                                                                                                                                                                                                                                                                                                                                                                                                                                                                                                                                                                                                                                                                                                                                                                                                                                                                                                                                                                                                                                                                                                                                                                                                                                                                                                                                                                                                                                                      |
| <p>135-136: What are “micro-units” here?</p>                                                                                                                                                                                                                            | <p>“micro-units” refer to microscopic components of the rock mass, a term delineated during the referenced study. We have added a concise explanation to clarify the meaning of this term in the manuscript:</p> <p>165 acting on a slope behavior. Fu and Liao (2010) presented a technique for implementing the non-linear<br/> 166 Hoek-Brown shear strength reduction, determining the correlation between normal and shear stress based<br/> 167 on the Hoek-Brown criterion (Fu and Liao, 2010). Subsequently, the micro-units (microscopic<br/> 168 components of the rock mass) instantaneous friction angle and cohesive strength under specific stress<br/> 169 conditions are calculated. Although this approach effectively addresses cost and labor issues, it still</p>                                                                                                                                                                                                                                                                                                                                                                                                                                                                                                                                                                                                                                                                                                                                                                                                                                                                                                                                                                                                                                                                                                                                                                                                                                                                                                                                                                                                                                                                                                                                                                                                                                                                                                                                                                                                                                                                                                                                                                                                                                                                                                                                                                                                                                                                                                                                                                                                                                                                                                                                                                                                                                                                                                                                                                                                                                                                                                                                                                                                                                                                                                                                                                                                                       |
| <p>140-142: The previous paragraphs have not demonstrated that these “conventional methods have shown limited success in handling big data...” More information needs to be provided in this or the previous paragraphs to provide justification for this argument.</p> | <p>The assertion that conventional methods show limited success in handling big data is not entirely complete or accurate. We have added more information in this section to explain the drawbacks of conventional methods and the necessity of using AI models in this research.</p> <p>143 that indicate risk levels (Crosta and Agliardi, 2003). Recently, Xu et al. (2018) utilized real-time remote<br/> 144 monitoring systems to measure internal stress, deep displacement, and surface strain. This data was used<br/> 145 to formulate forecasting models to assess slope stability, particularly in railway construction (Xu et al.,<br/> 146 2018). However, a common challenge with this method is the instability and frequent changes in the terrain<br/> 147 and geology of landslide-prone areas. This necessitates constant updates to the computational model,<br/> 148 which can be time-consuming and labor-intensive.</p> <p>149 Moreover, physical-based numerical and laboratory modeling methods, which simulate phenomena<br/> 150 at a laboratory scale, are also gaining traction in landslide research. These methods aim to maintain<br/> 155 reservoir in Italy (Mufundirwa et al., 2010). In another study, Wu (2010) employed the numerical<br/> 156 discontinuous deformation analysis method to simulate a blocky assembly's post-failure behavior,<br/> 157 incorporating earthquake seismic data (Wu, 2010). Meanwhile Another study follow this trend by Jiang<br/> 158 et al. (2011), who utilized fluid-solid coupling theory to simulate displacement and capture capturing the<br/> 159 interaction between fluid and solid materials (Jiang et al., 2011). However, both numerical models and<br/> 160 laboratory modeling methods require substantial effort from researchers. These approaches demand deep<br/> 161 expertise and the development of complex models. More importantly, they rely heavily on assumptions<br/> 162 during the simulation process and may not accurately reflect real-world conditions, leading to significant<br/> 163 errors.</p> <p>164 Stability analysis is another commonly used method related to physics, which evaluates the forces<br/> 165 acting on a slope behavior. Fu and Liao (2010) presented a technique for implementing the non-linear<br/> 166 Hoek-Brown shear strength reduction, determining the correlation between normal and shear stress based<br/> 167 on the Hoek-Brown criterion (Fu and Liao, 2010). Subsequently, the micro-units (microscopic<br/> 168 components of the rock mass) instantaneous friction angle and cohesive strength under specific stress<br/> 169 conditions are calculated. Although this approach effectively addresses cost and labor issues, it still<br/> 170 heavily relies on the researcher's researcher's assumptions and is limited by the ability to utilize only a<br/> 171 small portion of data from the research area.</p> <p>172 However, in landslide studies, monitoring data is constantly updated, generating large volumes daily<br/> 173 with a temporal relationship (Peternel et al., 2022; Corominas et al., 2014). Hence, conventional methods<br/> 174 have shown limited success in handling big data, especially in identifying highly intricate samples that<br/> 175 require analysis of time series relationships or complex nonlinear associations. As previously mentioned,<br/> 176 using conventional methods in landslide research presents numerous challenges whenever data changes<br/> 177 or gets updated. In contrast, AI models can overcome these difficulties by automatically learning to<br/> 178 identify connections between input and output data. AI models can be updated to incorporate additional<br/> 179 input variables and handle increasing amounts of data flexibly in response to real-world conditions.<br/> 180 Therefore, AI models will be utilized in this research instead of conventional methods.</p> |
| <p>154: Is there any discussion on why this model was</p>                                                                                                                                                                                                               | <p>Pham et al. (2016) did not explain why the support</p>                                                                                                                                                                                                                                                                                                                                                                                                                                                                                                                                                                                                                                                                                                                                                                                                                                                                                                                                                                                                                                                                                                                                                                                                                                                                                                                                                                                                                                                                                                                                                                                                                                                                                                                                                                                                                                                                                                                                                                                                                                                                                                                                                                                                                                                                                                                                                                                                                                                                                                                                                                                                                                                                                                                                                                                                                                                                                                                                                                                                                                                                                                                                                                                                                                                                                                                                                                                                                                                                                                                                                                                                                                                                                                                                                                                                                                                                                                                                                   |

|                                                                                                                                                                                                                                                                                                                                                                                                                                       |                                                                                                                                                                                                                                                                                                                                                                                                                                                                                                                                                                                                                                                                                                                                                                                                                                                                                                                                                                                                                                                                                                                                                                                                                                                                                                                                                                                                                                                                                                                                                                                                                                                                                                                                                                                                                                                                                                                                                                                   |
|---------------------------------------------------------------------------------------------------------------------------------------------------------------------------------------------------------------------------------------------------------------------------------------------------------------------------------------------------------------------------------------------------------------------------------------|-----------------------------------------------------------------------------------------------------------------------------------------------------------------------------------------------------------------------------------------------------------------------------------------------------------------------------------------------------------------------------------------------------------------------------------------------------------------------------------------------------------------------------------------------------------------------------------------------------------------------------------------------------------------------------------------------------------------------------------------------------------------------------------------------------------------------------------------------------------------------------------------------------------------------------------------------------------------------------------------------------------------------------------------------------------------------------------------------------------------------------------------------------------------------------------------------------------------------------------------------------------------------------------------------------------------------------------------------------------------------------------------------------------------------------------------------------------------------------------------------------------------------------------------------------------------------------------------------------------------------------------------------------------------------------------------------------------------------------------------------------------------------------------------------------------------------------------------------------------------------------------------------------------------------------------------------------------------------------------|
| <p>the most successful?</p>                                                                                                                                                                                                                                                                                                                                                                                                           | <p>vector machine (SVM) model provided the most accurate predictions compared to other models. They simply noted that the superior performance of the SVM model was consistent with conclusions from numerous past studies.</p> <p>From our perspective, the study by Pham et al. did not employ methods to search for optimal hyperparameters to minimize the errors of the AI models (such as grid search or metaheuristic optimization algorithms). This oversight resulted in the models not operating under optimal conditions. Consequently, determining the truly effective model in their study remains challenging.</p> <p>Therefore, in the reference section of our current research, we can only mention the SVM as the most effective model according to their conclusions without further explanation due to the lack of optimization methods. We hope the reviewers understand this challenge we face.</p>                                                                                                                                                                                                                                                                                                                                                                                                                                                                                                                                                                                                                                                                                                                                                                                                                                                                                                                                                                                                                                                         |
| <p>163-164: Please define what the term “feature engineering” is here</p>                                                                                                                                                                                                                                                                                                                                                             | <p>Adding further explanation for the term "feature engineering" will enhance readers' understanding of this study. We have included the requested annotation below as per the reviewer's suggestion.</p> <p>201 interrelationships, mainly when data availability is limited (Zhang et al., 2020). Finally, feature<br/> 202 engineering (the process of selecting and transforming input variables to enhance the performance of the<br/> 203 models) is computationally intensive and labor-intensive, limiting its applicability when rapid forecasting<br/> 204 is required.</p>                                                                                                                                                                                                                                                                                                                                                                                                                                                                                                                                                                                                                                                                                                                                                                                                                                                                                                                                                                                                                                                                                                                                                                                                                                                                                                                                                                                             |
| <p>166: these parameters (topographic slope and soil parameters) don't necessarily have to be one-dimensional. Topography can be 2-D and soil parameters can be 3-D (and perhaps even time-dependent).</p> <p>168-169: from my limited understanding of AI-based models, most are black boxes and therefore disentangling physical processes can be difficult. I thought this was the domain of physics-informed neural networks?</p> | <p>We fully agree with the reviewer's comments regarding the inaccuracies in this paragraph. We have revised the paragraph as follows:</p> <p>205 <del>Given that slope profiles and soil parameters are one-dimensional variables, alongside the</del><br/> 206 <del>mentioned machine learning models, a range of neural network models, from simpler ones like</del><br/> 207 <del>Artificial Neural Networks (ANN) to more advanced approaches such as Deep Neural Networks (DNNs)</del><br/> 208 <del>and CNN are also employed in research related to landslide (Kumar et al., 2017; Zheng et al., 2022)</del><br/> 209 <del>to uncover the relationship between slope stability and input parameters with minimal computational</del><br/> 210 <del>overhead (Fu et al., 2022). Notably, CNN models have become increasingly popular and are widely used</del><br/> 211 <del>in research related to this disaster. CNN models often yield superior predictive results than other models</del><br/> 212 <del>in landslide susceptibility assessment and displacement prediction (He et al., 2024). Additionally, CNN</del><br/> 213 <del>models have been used in studies of this disaster. While CNN was initially designed for image processing,</del><br/> 214 <del>its input and internal architecture are tailored for two-dimensional matrices, including the convolution</del><br/> 215 <del>kernel and feature map. To address the one-dimensional nature of slope profiles and soil physical and</del><br/> 216 <del>mechanical parameters, Pei, Meng, &amp; Zhu developed a 1D CNN model with dynamic inputs to account</del><br/> 217 <del>for time-varying trigger factors (Pei et al., 2021). Their approach demonstrated superior performance to</del><br/> 218 <del>conventional machine learning models regarding accuracy and robustness. However, it's worth noting that</del><br/> 219 <del>this approach has yet to gain widespread adoption.</del></p> |
| <p>184: “predicting landslide displacement” would be more specific here</p>                                                                                                                                                                                                                                                                                                                                                           | <p>We have revised the term “landslide prediction” to “predicting landslide displacement” according to the reviewer's request.</p> <p>226 employs a combination of machine learning methods, time-series deep learning, and CNN models to<br/> 227 compare and determine the most suitable model for predicting landslide displacement prediction.<br/> 228 Therefore, our research aims to address this gap.</p>                                                                                                                                                                                                                                                                                                                                                                                                                                                                                                                                                                                                                                                                                                                                                                                                                                                                                                                                                                                                                                                                                                                                                                                                                                                                                                                                                                                                                                                                                                                                                                 |
| <p>Section 3.1 (Lines 218-277): This part confused me at first because CNN's deal with imagery and you</p>                                                                                                                                                                                                                                                                                                                            | <p>We fully agree with the reviewer's comment and have added a paragraph to further elaborate on this</p>                                                                                                                                                                                                                                                                                                                                                                                                                                                                                                                                                                                                                                                                                                                                                                                                                                                                                                                                                                                                                                                                                                                                                                                                                                                                                                                                                                                                                                                                                                                                                                                                                                                                                                                                                                                                                                                                         |



are using time series vectors. It is later clarified in the paper that the time series data are converted to images for use with the models, but it would be worth stating something up front that vector data can also be utilized in this construct with the prop

250 (Fig. 3): the 3x3 kernel illustrated here is mislabeled as 2x2

point, as detailed below.

325 CNN models are typically used for image processing tasks. However, the input data for this study is  
 326 in numerical and vector form. Therefore, several transformation steps are required to convert this  
 327 numerical and vector data into image data suitable for CNN input. Detailed information about these  
 328 transformation steps can be found in the study by Chou and Nguyen 2023 (Chou and Nguyen, 2023).

The incorrect annotation of the kernel has been corrected in the revised version of this figure.

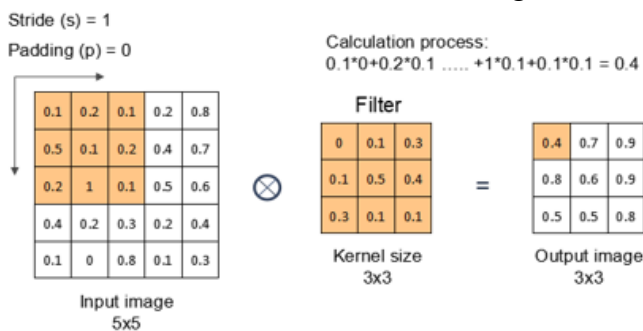

Figure A-2. Processing flow in convolution layer.

292: It's not clear here why RNNs are well-suited to learning time series with short-term dependencies. Please clarify.

We have provided additional reasoning as to why RNNs are well-suited for learning time series with short-term dependencies, as requested by the reviewer.

hidden layer;  $b$  is the bias term; and  $\tanh()$  represents the hyperbolic tangent activation function, i.e.,  $\tanh(x) = \frac{1 - e^{-2x}}{1 + e^{-2x}}$ . The mechanism of learning over time steps, stored within cells, enables RNNs to capture complex relationships between cells and time sequences effectively. However, as the duration of dependencies increases, RNN models are susceptible to issues related to vanishing gradients (Bengio et al., 1994). Therefore, RNNs are well-suited to learning time series involving short-term dependencies.

318-322 (Performance Metrics): If you are assigning a separate section to performance metrics, it would be good to describe what each one is and the benefits and drawbacks for each metric.

We greatly appreciate this feedback from the reviewer. Performance metrics serve as evaluation criteria for AI models in this study. Providing comprehensive information about them will enhance readers' understanding of this research. Therefore, we have incorporated detailed information about these performance metrics in Section 3.4.2 as follows:

375 **3.4.2 Performance Metrics**  
 376 This study utilized four widely recognized performance measures to assess the model's model's  
 377 effectiveness in prediction accuracy (Chou and Nguyen, 2023). The measures included mean absolute  
 378 error (MAE), mean absolute percentage error (MAPE), and root mean square error (RMSE).  
 379 MAE represents the mean of absolute errors, calculated as the average of the absolute  
 380 differences between actual and predicted values. Its advantage lies in its simplicity, which  
 381 provides a straightforward measure of average prediction error. However, a drawback of MAE is  
 382 its insensitivity to more significant errors, so it may not effectively highlight differences between  
 383 models when significant errors are present. It is defined as:  
 384 
$$MAE = \frac{1}{n} \sum_{i=1}^n |y_i - \hat{y}_i| \tag{5}$$
  
 385 where  $n$  is the number of predictions,  $y_i$  is the  $i^{\text{th}}$  forecasted value, and  $\hat{y}_i$  is the corresponding  $i^{\text{th}}$   
 386 actual value.  
 387 MAPE quantifies the average absolute error ratio—derived from the differences between  
 388 actual and forecasted values—to the actual value. It provides a clear metric in percentage terms,  
 389 facilitating straightforward interpretation across various datasets. However, MAPE's limitation  
 390 arises from its sensitivity to zero values in the actual data, which can become undefined or  
 391 impractical to compute, limiting its utility in scenarios involving zero or near-zero actual values.  
 392 The expression for MAPE is as follows:

393  $MAPE = \frac{1}{n} \sum_{i=1}^n \left| \frac{y_i - \hat{y}_i}{y_i} \right|$  (6)

394 where  $n$  is the number of predictions,  $y_i$  is the  $i^{\text{th}}$  forecasted value, and  $\hat{y}_i$  is the corresponding  $i^{\text{th}}$

395 actual value.

396 RMSE represents the square root of the average squared error between actual and forecasted

397 values and is widely used for its ability to indicate the dispersion of errors. This method captures

398 the magnitude and direction of errors, making it practical for assessing overall prediction

399 accuracy. However, RMSE tends to be more sensitive to outliers and significant errors than MAE

400 due to its squaring of errors during computation. This sensitivity can disproportionately affect its

401 evaluation in datasets with extreme values. The expression for RMSE is as follows:

402  $RMSE = \sqrt{\frac{1}{n} \sum_{i=1}^n (y_i - \hat{y}_i)^2}$  (7)

403 where  $n$  is the number of predictions,  $y_i$  is the  $i^{\text{th}}$  forecasted value, and  $\hat{y}_i$  is the corresponding  $i^{\text{th}}$

404 actual value.

328: What exactly is a particle in this instance? Some context is needed here.

We fully agree with the reviewer's comment. Our manuscript lacked sufficient detail regarding the term 'particle.' We have now added an explanatory section on this term in Section 3.5.

405 **3.5 Age of Exploration-Inspired Optimizer**

406 This study employs a range of AI models to forecast deep-seated displacement in mountainous

407 regions. To enhance the prediction accuracy of these AI models, the study incorporates a novel

408 metaheuristic optimization algorithm known as the Age of Exploration-Inspired Optimizer (AEIO).

409 Developed by Chou and Nguyen in 2024, this algorithm has demonstrated high effectiveness in fine-

410 tuning the hyperparameters of AI models. This algorithm treats each particle in the search domain as an

411 explorer. The movement of particles toward regions with higher fitness values parallels the exploratory

412 activities of the Age of Exploration, where explorers sought ideal locations for establishing colonies. In

413 this study, each particle represents a set of hyperparameters, with the ultimate goal of the search process

414 being to identify the optimal particle or hyperparameter set that minimizes prediction error for AI models.

415 Figure 3 illustrates the AEIO algorithm.

337 (Fig. 8): The red arcuate arrows that link the positional strategies appears to suggest that once one strategy is selected, the explorer goes from one strategy to the next when in fact they return to the middle after each time step (correct?). If that is the case, then the arrows should arc back down to the central location to reflect the decision-making process that occurs with each positional change.

We have revised the illustrative figure for the AEIO algorithm. Specifically, we removed the red arcuate arrows linking the positional strategies to prevent any misunderstanding for the reader. Additionally, we added bidirectional arrows from the action of choosing the strategy to each colony search action. Furthermore, we included arrows around the central image of the explorer-choosing a strategy, indicating that the search process repeats with each iteration.

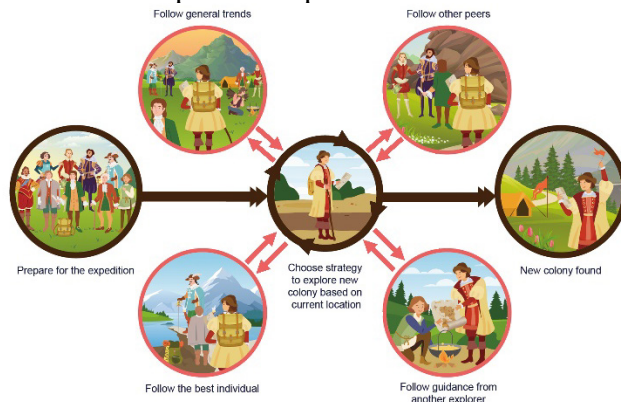

The diagram illustrates the AEIO algorithm's search process. At the center is a circular image of an explorer choosing a strategy. Six arrows radiate from this central image to surrounding circular images representing different actions: 'Follow general trends', 'Follow other peers', 'Prepare for the expedition', 'Follow the best individual', 'Follow guidance from another explorer', and 'New colony found'. Bidirectional arrows connect the central explorer to each of these action images, indicating a continuous and iterative process.

361-372: These two steps need to be elaborated on a little bit more, as it is presented somewhat confusingly and the equations for (8) and (9) are identical.

We acknowledge that the two equations mentioned above are quite similar. The only difference between them lies in the values  $x_{i,d}(t)$  and  $x_{1,d}(t)$ . Despite this slight variation in the formula, the mechanisms of the two movements are fundamentally different.

One equation guides the current particle towards the best particle, while the other directs the current particle in a direction based on the distance of a random particle from the best one. We have added annotations in the explanations of the formulas. These annotations clearly specify the mathematical notation for each type of particle in the explanations. We hope that this addition will make the movement mechanisms of the particles more comprehensible.

431 • **Explorers follow general trends**

432 The explorer choosing this movement type will calculate the distance from their location  $x_{i,d}(t)$  to  
433 the center of all other explorers ( $Meanvl_d(t)$ ), then attempt to move towards that central point in the  
434 hope of finding a better location with the potential to establish a new colony. The following formula  
435 determines the explorer's position after the movement:

$$436 x_{i,d}(t+1) = x_{i,d}(t) + \alpha * (Meanvl_d(t) - x_{i,d}(t)) \times rand(0,1) \times R \quad (8)$$

$$437 Meanvl_d(t) = \frac{x_{1,d}(t) + x_{2,d}(t) + \dots + x_{n_{pop},d}(t)}{n_{pop}} \quad (9)$$

438 where  $d = 1, 2, \dots, D$ ;  $D$  is the number of dimensions;  $i = 1, 2, \dots, n_{pop}$ ;  $n_{pop}$  is the total number of  
439 explorers;  $t = 1, 2, \dots, MaxIt$  is the number of iterations;  $MaxIt$  is the maximum value of iteration;  $\alpha$  is a  
440 parameter for adjusting the particle's movement toward the centroid position (usually equals 3).  
441  $Meanvl_d(t)$  is the centroid of all particles in dimension  $d$ .  $rand(0,1)$  is the random number in the range  
442  $[0,1]$ .  $R$ : a number that equals 1 or 2 depending on the value of  $rand(0,1)$  per the equation.  $R =$   
443  $round(1 + rand(0,1) \times 1)$ .  $x_{i,d}(t)$  is the location of particle  $i$  in iteration  $t$ .  $x_{i,d}(t+1)$  is the location  
444 of particle  $i$  in iteration  $(t+1)$ .

445 • **Explorers follow three other peers**

446 Explorers employing this movement method will calculate the average position of three randomly  
447 selected other explorers ( $\frac{x_{1,d}(t) + x_{2,d}(t) + x_{3,d}(t)}{3}$ ) and then move toward this newly calculated average  
448 position. The explorer's new position is computed using the following formula:

$$449 x_{i,d}(t+1) = x_{i,d}(t) + \left( \frac{x_{1,d}(t) + x_{2,d}(t) + x_{3,d}(t)}{3} - x_{i,d}(t) \right) \times rand(0,1) \times R \quad (10)$$

450 where:  $x_{1,d}(t)$ ,  $x_{2,d}(t)$  and  $x_{3,d}(t)$  are three random explorers in dimension  $d$  at iteration  $t$ ,  $d = 1, 2, \dots, D$ ;  
451  $D$  is the number of dimensions;  $i = 1, 2, \dots, n_{pop}$ ;  $n_{pop}$  is the total number of explorers;  $t = 1, 2, \dots, MaxIt$   
452 is the number of iterations;  $MaxIt$  is the maximum value of iteration.

453 • **Explorers follow the best one**

454 According to this strategy, the explorer ( $x_{i,d}(t)$ ) will move closer to the position of another explorer  
455 currently holding the best position ( $Best_d(t)$ ), as determined by the following formula:

$$456 x_{i,d}(t+1) = x_{i,d}(t) + (Best_d(t) - x_{i,d}(t)) \times rand(0,1) \times R \quad (11)$$

457 where:  $Best_d(t)$  represents the position of the particle with the best fitness in dimension  $d$  at iteration  $t$ ,  
458 the parameters  $d$  and  $t$  hold the same significance as defined in Equation 10.

459 • **Explorers follow guidance from another one**

460 Explorers in favorable positions with access to information can execute this movement strategy. In  
461 this scenario, explorers ( $x_{i,d}(t)$ ) will consult with each other another explorer. The consulted explorer will  
462 compare their direction and distance to the best individual, who holds the most favorable position  
463 ( $Best_d(t)$ ) and guide the inquirer. This algorithm assumes that the inquirer can be any explorer, i.e., a  
464 random explorer ( $x_{1,d}(t)$ ). The following formula describes how to calculate the new position of the  
465 explorer following this strategy:

$$466 x_{i,d}(t+1) = x_{i,d}(t) + (Best_d(t) - x_{1,d}(t)) \times rand(0,1) \times R \quad (12)$$

467 where:  $x_{1,d}(t)$  is a random explorer in dimension  $d$  at iteration  $t$ . the parameters  $d$  and  $t$  hold the same  
468 significance as defined in Equation 10.

388 (Fig. 10): Much more information is needed in the figure caption here, as the current captions are essentially vacant. Additionally, the map in (a) is missing crucial information such as latitude and longitude graticules, and contains extraneous information (e.g., random text and other symbols that are not defined). With regard to (b), was the landslide failure plane identified with these cores? Or is the failure plane depth only known in the

We have made several adjustments to Figure 10 and Figure 11. Specifically, in Figure 10, we have added information on latitude and longitude. Additionally, we have removed unnecessary details (e.g., random text and undefined symbols) from Figure 10.

extensometer boreholes? Please provide more information here or elsewhere in the manuscript.

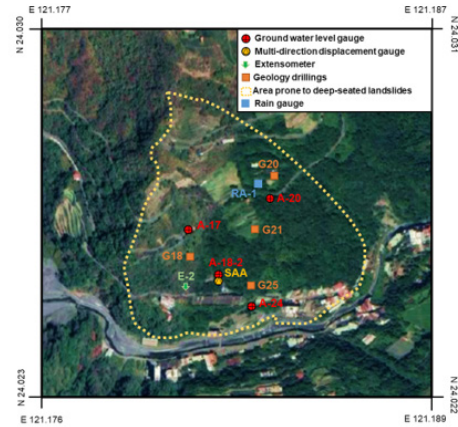

Image source: Imagery ©2022 CNES/Airbus, Maxar Technologies, Map data ©2022 Google

Figure 5. Locations of measurement devices

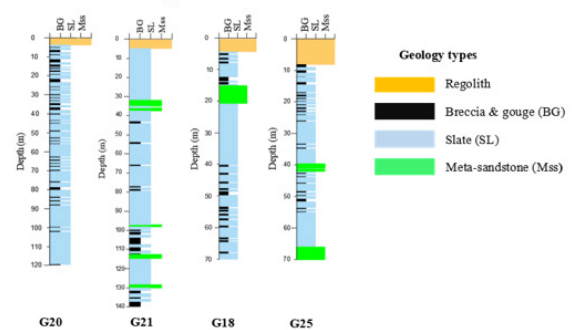

Figure 6. Illustration of geological drilling survey

For Figure 11, we primarily use this image to provide readers with geological information about the area.

These survey boreholes utilize data inherited from the study by Lin et al. (2020), which provides a detailed account of the failure plane depths. We have included information on the depth of the failure planes for each survey borehole in the manuscript and added a citation to the previous study, allowing readers to seek further details on these surface plane determinations.

502 research area and shows the distribution of four survey boreholes (G20, G21, G18, and G25) along the  
 503 slope. Regolith, slate, and meta-sandstone are three distinct lithological units revealed through drilling.  
 504 Additionally, the study by Lin et al. identified the depths of failure planes in these survey boreholes.  
 505 Specifically, boreholes G18 and G25 did not record any failure planes, while boreholes G20 and G21  
 506 recorded failure planes at depths of 85 meters and 106 meters, respectively. These failure planes were  
 507 identified based on inclinometer data from the corresponding study (Lin et al., 2020).

508 Initially, the thickness of the topmost regolith layer was found to be less than 10 meters. Secondly,

407: Please cite the previous research here

We have added additional citations in this paragraph as per the reviewer's request.

515 Previous research has detected signs of brittle deformation in the area. These indications include  
 516 chevron folds within cleavages, visible cracks, and intricate jigsaw puzzle-like patterns at the head of the  
 517 rock formations. Overturned and flexural toppling cleavages are prevalent towards the toe of the slope.  
 518 Additionally, kink bands are observable on ~~elevages fractures that have recently undergone~~ recently  
 519 undergoing flexural folding along the eastern boundary. Notably, horizontal cleavages near the toe region  
 520 also exhibit inter-cleavage gouges. Further details on this geological information can be found in the study  
 521 by Lin et al. (2020). These instances highlight the potential for significant geological changes and  
 522 landslide risk in this region.

407-412: I think the term “cleavage” is misused here. Do the authors mean “fracture”? Typically, cleavage refers to the tendency of a mineral to break along planes defined by crystal lattice structure and are typically not seen at the scale of an entire hillslope. Lastly, it would be worth putting these observation zones on the map of the landslide for reference.

We greatly appreciate the reviewers for this suggestion; we fully agree that the term “fracture” is more appropriate than “cleavage” and we have made the corresponding change.

515 Previous research has detected signs of brittle deformation in the area. These indications include  
 516 chevron folds within cleavages, visible cracks, and intricate jigsaw puzzle-like patterns at the head of the  
 517 rock formations. Overturned and flexural toppling cleavages are prevalent towards the toe of the slope.  
 518 Additionally, kink bands are observable on **cleavages fractures that have recently undergone recently**  
 519 **undergoing** flexural folding along the eastern boundary. Notably, horizontal cleavages near the toe region  
 520 also exhibit inter-cleavage gouges. **Further details on this geological information can be found in the study**  
 521 **by Lin et al. (2020).** These instances highlight the potential for significant geological changes and  
 522 landslide risk in this region.

In response to the suggestion to display observation zones on the map, we have included them in Figure 10. In addition to showing the locations of the boreholes and data collection sites, Figure 10 delineates the areas prone to deep-seated landslides, which represent the observation zones.

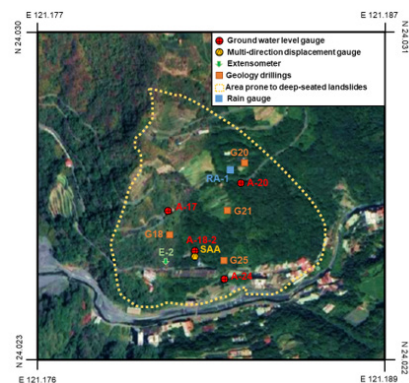

Image source: Imagery ©2022 CNES/Airbus, Maxar Technologies, Map data ©2022 Google  
 Figure 5. Locations of measurement devices

426: How was the rainfall data measured? Via a local rain gauge? If so, can put it on the map as well.

Rainfall data for this study were collected using a rain gauge installed on-site. The location of the rain gauge has been annotated on the map in Figure 10.

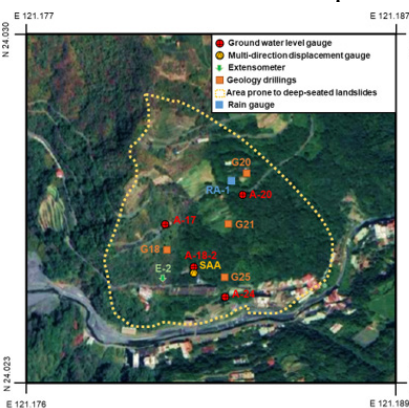

Image source: Imagery ©2022 CNES/Airbus, Maxar Technologies, Map data ©2022 Google  
 Figure 5. Locations of measurement devices

438-442 (Figs. 12-14): It is very difficult to compare the time series data as all the axes are scaled differently. I strongly recommend making one three-

We have revised Figures 12-14 as per the author's request. Specifically, we merged all three original figures into one and placed them on a single

panel figure that is aligned in the time dimension instead of three separate figures. I would also recommend putting the known storms from Table 2 as vertical bands on each subplot. This will really help unify the datasets and make it much easier for readers to discern how precipitation, groundwater levels, and landslide displacement are aligned.

timeline. Additionally, we added a graph to depict the precipitation of recorded heavy rainfall in the studied area.

Placing all graphs on the same timeline facilitates easier tracking of concurrent data variations for readers. Moreover, it highlights the relationships between different datasets.

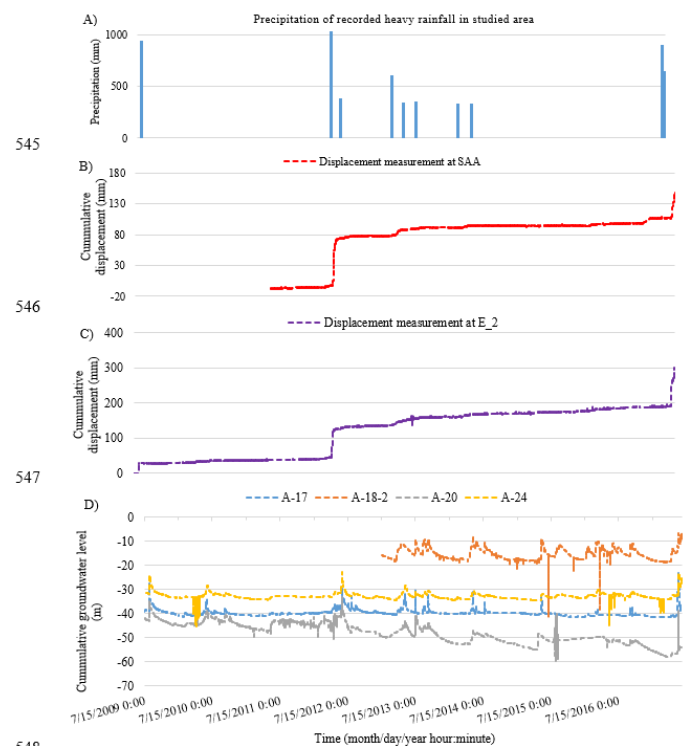

548  
549  
550  
551  
Figure 7. Unified timeline visualization of data in this study.  
A) Precipitation of recorded heavy rainfall in the studied area; B) Measured displacements from extensometer SAA C) Measured displacements from extensometer E\_2; D) Groundwater levels at stations A-17, A-18-2, A-20, and A-24.

446-447: Should be “June” instead of “August”, otherwise the groundwater will be responding to a future event!

We sincerely apologize for this confusion. The error is corrected as below.

553 increases coinciding with periods of pronounced fluctuations in groundwater levels. Specifically, in June  
554 2012, there was a notable surge in groundwater levels attributed to heavy rainfall from June 8, 2012, to  
555 June 17, 2012, totaling 1029 mm over 219 hours (as indicated in Table 2 and Figure 7A). The abnormal  
556 rise in groundwater levels caused a structural alteration in the area's soil, consequently amplifying deep-

457-458: The groundwater levels that are apparently driving displacement here are 10s of meters below the ground surface (e.g., Fig. 14). Which impacts on soil structure by thermal processes are you referring to? Do thermal effects at this depth contribute to landsliding? Please provide context and references here to back up this statement or otherwise remove.

In this study, we incorporated temperature as an input for AI models to predict deep-seated landslides, due to its significant impact on pore water pressure and effective frictional resistance forces, which in turn affects soil strength. We have included several citations from past research to substantiate this argument, as outlined below.

564 In addition to groundwater level data, weather factors such as temperature and humidity are also  
565 utilized as input data for the prediction model. This study includes temperature as an input variable for AI  
566 models to predict deep-seated displacement due to its impact on soil structure. Elevated temperatures can  
567 cause thermal expansion of soil particles, which can increase pore water pressure and reduce effective  
568 frictional resistance forces (Pinyol et al., 2018). Additionally, previous research has shown a relationship  
569 between temperature and the likelihood of landslides in clay-rich soils, which are also present in the  
570 geological composition of Lushan Mountain (Shibasaki et al., 2017; Loche and Scaringi, 2023). These  
571 factors significantly impact the soil structure and can trigger substantial displacement or landslides.

|                                                                                                                                                                                                                                |                                                                                                                                                                                                                                                                                                                                                                                                                                                                                                                                                                                                                                                                                                                                                                                                                                                                                                                                                                                                                                                                                                                                                                                                                                                   |
|--------------------------------------------------------------------------------------------------------------------------------------------------------------------------------------------------------------------------------|---------------------------------------------------------------------------------------------------------------------------------------------------------------------------------------------------------------------------------------------------------------------------------------------------------------------------------------------------------------------------------------------------------------------------------------------------------------------------------------------------------------------------------------------------------------------------------------------------------------------------------------------------------------------------------------------------------------------------------------------------------------------------------------------------------------------------------------------------------------------------------------------------------------------------------------------------------------------------------------------------------------------------------------------------------------------------------------------------------------------------------------------------------------------------------------------------------------------------------------------------|
| <p>459-461: Please describe more the data used here? For example, is it daily data? What is the grid size? What is the measurement source?</p>                                                                                 | <p>We have provided additional information to help readers better understand the data collected from the website <a href="https://power.larc.nasa.gov">https://power.larc.nasa.gov</a>.</p> <p>572 This study collected groundwater level and displacement data on-site using sensors. Furthermore,<br/> 573 temperature and humidity data were obtained from the website <a href="https://power.larc.nasa.gov">https://power.larc.nasa.gov</a>. This dataset<br/> 574 is part of the Prediction of Worldwide Energy Resource (POWER) project, developed by the National<br/> 575 Aeronautics and Space Administration (NASA) of the United States. The POWER solar data derives from<br/> 576 satellite observations, which are used to infer surface insolation values. Meteorological parameters are<br/> 577 sourced from the Modern-Era Retrospective analysis for Research and Applications, Version 2 (MERRA-<br/> 578 2) assimilation model. The primary solar data is available with a global resolution of 1° x 1°<br/> 579 latitude/longitude, while the meteorological data is provided at a finer resolution of ½° x ½°<br/> 580 latitude/longitude. Users can download the data hourly, daily, or monthly through this website.</p> |
| <p>488: Indeed! Having forecast data a week in advance would be extremely beneficial.</p>                                                                                                                                      | <p>We sincerely appreciate the reviewer's acknowledgment. We hope that these predictive results will contribute to the advancement of forecasting methods, ultimately aiding in the evacuation efforts prior to landslide disasters.</p>                                                                                                                                                                                                                                                                                                                                                                                                                                                                                                                                                                                                                                                                                                                                                                                                                                                                                                                                                                                                          |
| <p>499: Specify process to be modeled (i.e., landslide displacement)</p>                                                                                                                                                       | <p>We have corrected this sentence for accuracy, as the focus of the study is on predicting deep-seated displacement rather than deep-seated landslides.</p> <p>616 4.1 Model Establishment</p> <p>617 Predicting deep-seated displacement landslides at Lushan Mountain is undoubtedly highly<br/> 618 challenging, given that such landslides depend on numerous factors. Therefore, multiple methods will be</p>                                                                                                                                                                                                                                                                                                                                                                                                                                                                                                                                                                                                                                                                                                                                                                                                                               |
| <p>502: editorial comment – shouldn't end sentence with "..."</p>                                                                                                                                                              | <p>We have removed the ellipsis at the end of this section as requested by the reviewer.</p> <p>617 Predicting deep-seated displacement landslides at Lushan Mountain is undoubtedly highly<br/> 618 challenging, given that such landslides depend on numerous factors. Therefore, multiple methods will be<br/> 619 employed simultaneously to identify the optimal AI model for prediction. These methods include single<br/> 620 machine learning, time series deep learning, CNN, and hybrid models.</p>                                                                                                                                                                                                                                                                                                                                                                                                                                                                                                                                                                                                                                                                                                                                     |
| <p>509 (Fig. 16): Very helpful flow chart</p>                                                                                                                                                                                  | <p>We sincerely appreciate the reviewer's praise. We consistently strive to use visuals and diagrams to convey our research, aiming to make it more accessible and comprehensible for readers.</p>                                                                                                                                                                                                                                                                                                                                                                                                                                                                                                                                                                                                                                                                                                                                                                                                                                                                                                                                                                                                                                                |
| <p>545: It would be helpful to have a figure showing a subset of the models plotted alongside the displacement data so readers could see how the differences in MAPE are actually reflected in the time series predictions</p> | <p>We fully agree with the reviewer's suggestion. Including a figure that illustrates the temporal variation in the predicted deep-seated displacements by different models will help readers clearly see how the differences in MAPE are actually reflected in the time series predictions. However, given the extensive number of AI models used in this study, displaying the prediction results of all models would increase the complexity of the charts, making it challenging to discern the differences in the models' performance. Therefore, we have chosen to display the displacement predictions of the most representative models, including the best machine learning model (XGBoost), the best time-series deep learning model (R-GRU), the best CNN model (MobileNet), and the best hybrid models (AEIO-MobileNet and AEIO-R-GRU).</p>                                                                                                                                                                                                                                                                                                                                                                                           |

|                                                                                                                                        |                                                                                                                                                                                                                                                                                                                                                                                                                                                                                                                                                                                                                                                                                                                                                                                                                                                                                                                                                                                                                                                                                                                                                                                                                                 |
|----------------------------------------------------------------------------------------------------------------------------------------|---------------------------------------------------------------------------------------------------------------------------------------------------------------------------------------------------------------------------------------------------------------------------------------------------------------------------------------------------------------------------------------------------------------------------------------------------------------------------------------------------------------------------------------------------------------------------------------------------------------------------------------------------------------------------------------------------------------------------------------------------------------------------------------------------------------------------------------------------------------------------------------------------------------------------------------------------------------------------------------------------------------------------------------------------------------------------------------------------------------------------------------------------------------------------------------------------------------------------------|
|                                                                                                                                        | 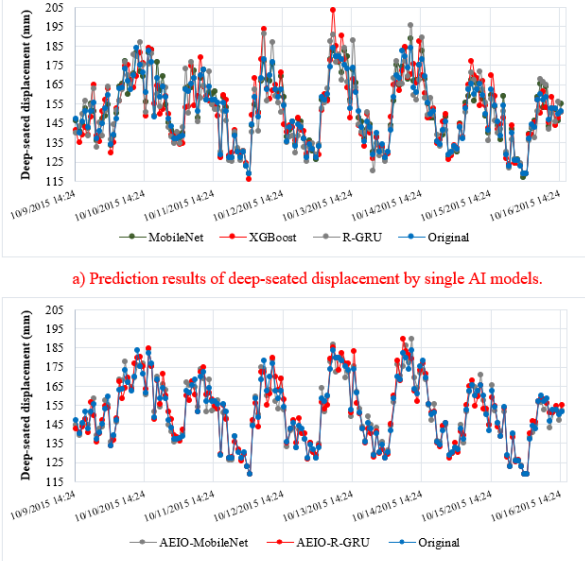 <p>a) Prediction results of deep-seated displacement by single AI models.</p> <p>b) Prediction results of deep-seated displacement by AI models optimized using the AEIO algorithm.</p> <p>Figure 10. Graph comparing the real and predicted deep-seated displacement.</p>                                                                                                                                                                                                                                                                                                                                                                                                                                                                                                                                                                                                                                                                                                                                                                                                                                                                   |
| <p>568: change “landslides” to “landslide displacement” or something similar</p>                                                       | <p>We have revised the term "deep-seated landslide" to "deep-seated displacement" following the reviewer's suggestion.</p> <p>683 <b>4.2.2 Best AI Model Finetuned by AEIO Algorithm</b></p> <p>684 This section will focus on fine-tuning the hyperparameters of the numerical model to enhance its</p> <p>685 performance in predicting deep-seated <del>landslides</del> displacement. The AEIO algorithm will fine-tune the</p> <p>686 hyperparameters of the study's best numerical AI model, the R-GRU model. Details regarding the names</p> <p>687 and search ranges of the hyperparameters are outlined in Table 8. The objective function of the AEIO</p>                                                                                                                                                                                                                                                                                                                                                                                                                                                                                                                                                             |
| <p>660-664: This is a nice motivating paragraph that belongs in the introduction and would help provide context for the study.</p>     | <p>We agree that including this information in the introduction will help clarify the context of our research and enable readers to better understand the benefits of these predictive models. Therefore, we have incorporated this information into the final paragraph of the introduction.</p> <p>89 This study represents the first instance of AI models being utilized to predict deep-seated landslides</p> <p>90 in Lushan Mountain. Additionally, it marks the inaugural application of AEIO for fine-tuning AI models</p> <p>91 in landslide-related research. Our findings provide a valuable resource for civil engineers, contractors, and</p> <p>92 inspectors involved in the planning and monitoring of construction projects in landslide-prone areas.</p> <p>93 Predicting the likelihood of landslide events can help minimize property loss, guide schedule adjustments,</p> <p>94 improve work safety, and ensure smooth traffic flow during critical periods. Additionally, understanding</p> <p>95 internal displacements provides engineers with precise data to evaluate the resilience of structures and</p> <p>96 infrastructure in vulnerable areas, enabling the issuance of prudent warnings.</p> |
| <p>668-668: Are these models not considered “conventional”? If not, why not? Could also be specified earlier on in the manuscript.</p> | <p>We sincerely apologize for this oversight; the term “conventional” should not be used for CNN models for the following reasons:</p> <ul style="list-style-type: none"> <li>- “Conventional models” refer to traditional, simple machine learning models such as regression, decision trees, support vector machines, etc. In contrast, CNNs are not traditional methods and have recently become widely used.</li> <li>- CNNs have been shown in numerous studies to yield superior performance compared to other models. Labeling CNNs as conventional models</li> </ul>                                                                                                                                                                                                                                                                                                                                                                                                                                                                                                                                                                                                                                                    |



|                                                                                                                                                                                                                                                                                                                                                                                                                                                                                                                                                                                                                                                                                                                                               |                                                                                                                                                                                                                                                                                                                                                                                                                                                                                                                                                                                                                                                                                                                                                                                                                                                                                                                                                                                                                                                                                                                                                                                                                                                                                                                                                                                                                                                                                                                                                                                                                                                                                                                                                                                                                                                                                                                                                                                                                                                                                                                                                                                                                                                                                                                                                                                                                                                                                                                                                                                                                                                                                                                                                                                                                                                                                                                                                    |
|-----------------------------------------------------------------------------------------------------------------------------------------------------------------------------------------------------------------------------------------------------------------------------------------------------------------------------------------------------------------------------------------------------------------------------------------------------------------------------------------------------------------------------------------------------------------------------------------------------------------------------------------------------------------------------------------------------------------------------------------------|----------------------------------------------------------------------------------------------------------------------------------------------------------------------------------------------------------------------------------------------------------------------------------------------------------------------------------------------------------------------------------------------------------------------------------------------------------------------------------------------------------------------------------------------------------------------------------------------------------------------------------------------------------------------------------------------------------------------------------------------------------------------------------------------------------------------------------------------------------------------------------------------------------------------------------------------------------------------------------------------------------------------------------------------------------------------------------------------------------------------------------------------------------------------------------------------------------------------------------------------------------------------------------------------------------------------------------------------------------------------------------------------------------------------------------------------------------------------------------------------------------------------------------------------------------------------------------------------------------------------------------------------------------------------------------------------------------------------------------------------------------------------------------------------------------------------------------------------------------------------------------------------------------------------------------------------------------------------------------------------------------------------------------------------------------------------------------------------------------------------------------------------------------------------------------------------------------------------------------------------------------------------------------------------------------------------------------------------------------------------------------------------------------------------------------------------------------------------------------------------------------------------------------------------------------------------------------------------------------------------------------------------------------------------------------------------------------------------------------------------------------------------------------------------------------------------------------------------------------------------------------------------------------------------------------------------------|
|                                                                                                                                                                                                                                                                                                                                                                                                                                                                                                                                                                                                                                                                                                                                               | <p>may diminish their value and advanced nature, potentially leading to misunderstandings about their applicability.</p> <p>Therefore, we will use the term “standard CNN models” to refer to models other than retrained CNN models. We have added a section to explain this terminology to prevent any confusion for the readers.</p> <p>318 This study will use various CNN models to predict deep-seated slope displacement. The CNN models<br/> 319 employed in this research include VGG (Simonyan and Zisserman, 2014), ResNet (He et al., 2016),<br/> 320 Inception (Szegedy et al., 2015), Xception (Chollet, 2016), MobileNet (Howard et al., 2017), DenseNet<br/> 321 (Huang et al., 2017), and NASNet (Zoph et al., 2018). To clarify, the term "standard CNN models" will<br/> 322 refer to models with structures that can be user-defined, while "retrained CNN models" will denote those<br/> 323 with architectures that have been researched and developed by other scientists and have been proven to<br/> 324 be highly effective.</p>                                                                                                                                                                                                                                                                                                                                                                                                                                                                                                                                                                                                                                                                                                                                                                                                                                                                                                                                                                                                                                                                                                                                                                                                                                                                                                                                                                                                                                                                                                                                                                                                                                                                                                                                                                                                                                                                                         |
| <p>678: Here again would be a great place to delve into the “why” a little bit more. Any thoughts why a certain class of models outperforms the others? This discussion section is quite short relative to the rest of this paper, and there are a lot of aspects to potentially discuss. Does withholding certain parameters (e.g., temperature, humidity, or both) impact the results substantially? If so, why might that be the case? Since so much work has been done to get to this stage of predictive success, a small amount of additional work may help elucidate the role of specific processes in aiding the predictability of landslide displacement in this context that could be useful for the broad readership of NHESS.</p> | <p>We have expanded the discussion section to provide a more comprehensive explanation of the study's results. Specifically, we have added reasons to explain why CNN models performed better than both machine learning and time-series deep learning models. Additionally, this discussion highlights a limitation of the study: the lack of analysis on the relative importance of each type of input data for the predictive capabilities of the AI models. This limitation underscores the need for further research to clarify these aspects.</p> <p>796 of our study lies in adopting pre-trained models, such as MobileNet, DenseNet, Inception, and VGG,<br/> 797 rather than conventional standard CNN models. The practicality of employing these pre-trained models<br/> 798 has demonstrated effectiveness in predicting displacement in this research.</p> <p>799 By employing various AI models, this study identifies the most effective model for predicting deep-<br/> 800 seated landslides and offers a comprehensive overview of the performance of different AI models. Initially,<br/> 801 machine learning models exhibited relatively high prediction errors, with MAPE ranging from 8.14% to<br/> 802 15.19%. This performance was generally lower than time-series deep learning models, which showed<br/> 803 MAPEs ranging from 7.9% to 14.73%. The superior performance of the time series deep learning models<br/> 804 is attributed to their ability to process sequential data and retain information from previous steps. This<br/> 805 enables them to learn patterns from the dataset more effectively than traditional machine learning models.</p> <p>806 However, compared to CNN models, the results of the time series deep learning models are not as<br/> 807 strong. This disparity is attributed to the superior learning mechanism of CNNs. The convolutional and<br/> 808 pooling layers in CNNs enable robust feature extraction from the input data. Convolutional layers are<br/> 809 particularly effective at identifying complex patterns and subtle features within time series data, primarily<br/> 810 when spatial correlations exist. This capability allows CNNs to uncover essential features that other<br/> 811 models might overlook.</p> <p>820 The input data used for the AI models were selected because they significantly influence the<br/> 821 likelihood of deep-seated landslides, as detailed in Section 3.6. However, a limitation of this study is that<br/> 822 it does not evaluate the relative importance of each input data type on prediction accuracy. Future research<br/> 823 should explore the impact of different combinations of input data on AI model performance. This could<br/> 824 help identify the significance of each input type and potentially reveal the optimal combination of inputs<br/> 825 to enhance prediction accuracy further.</p> |
